# Supplementary material
Source: HighWire-hosted journal article supplement (https://fn.bmj.com/content/108/3/295)
Supplement: inline-supplementary-material-2 [file inline-supplementary-material-2.pdf]

Supplemental table 2. Proportion of children scoring  $\leq 15^{\text{th}}$  and  $\leq 5^{\text{th}}$  percentile on motor assessment using the MABC-2 at 6-8 and 10-12 years of age among children who completed assessments on both occasions. Comparison to norms using a binomial test. McNemar test revealed no significant difference between the two assessment occasions neither for the proportion of children scoring  $\leq 15^{\text{th}}$  percentile ( $p=0.791$ ), nor for the proportion of children scoring  $\leq 5^{\text{th}}$  percentile ( $p=0.549$ ). Abbreviations: MABC-2; Movement assessment battery for children, 2<sup>nd</sup> edition; perc, percentile, CI, Confidence interval.

| <b>Motor Assements</b>           | <b><math>\leq 15^{\text{th}}</math> perc</b> | <b>%</b> | <b>95% CI</b> | <b>p-value</b> | <b><math>\leq 5^{\text{th}}</math> perc</b> | <b>%</b> | <b>95% CI</b> | <b>p-value</b> |
|----------------------------------|----------------------------------------------|----------|---------------|----------------|---------------------------------------------|----------|---------------|----------------|
| MABC-2 at 6-8 years of age (n)   | 11/44                                        | 25       | 13-40         | 0.050          | 7/44                                        | 16       | 7-30          | 0.001          |
| MABC-2 at 10-12 years of age (n) | 13/44                                        | 30       | 17-45         | 0.006          | 10/44                                       | 23       | 11-38         | <0.001         |
